## Title

Better late than never: optimising the proteomic analysis of field-collected octopus

## Authors

Qiaz Q.H. Hua, Clifford Young, Tara L. Pukala, Peter Hoffmann, Jasmin C. Martino, Bronwyn M. Gillanders, Zoe A. Doubleday

**S1 Table. Recipe for homemade RNA*later* and RIPA buffer.**

| Chemical Solution      | Ingredient List & Quantity                                                                                                                                                                                                                                                                                                                                                                                                                                                                                                                               |
|------------------------|----------------------------------------------------------------------------------------------------------------------------------------------------------------------------------------------------------------------------------------------------------------------------------------------------------------------------------------------------------------------------------------------------------------------------------------------------------------------------------------------------------------------------------------------------------|
| <b>RNA<i>later</i></b> | <ul style="list-style-type: none"><li>• 935 ml of nuclease-free and protease-free water (Acros Organics)</li><li>• 1.4 kg of ammonium sulfate dihydrate (Univar Solutions)</li><li>• 40 ml of 0.5 M Ultrapure EDTA, pH 8 (ThermoFisher)</li><li>• 25 ml of 1 M sodium citrate (Chem-Supply)</li></ul> <p>Combine the above ingredients and stir on low heat until the ammonium sulfate has dissolved. Allow it to cool. Adjust the pH of the solution to 5.2 by using 1 M sulfuric acid (Sigma Aldrich). Store at room temperature or in the fridge.</p> |
| <b>RIPA Buffer</b>     | <ul style="list-style-type: none"><li>• 150 mM NaCl (Merck)</li><li>• 1% Igepal (Sigma Aldrich)</li><li>• 0.5% sodium deoxycholate (Sigma Aldrich)</li><li>• 0.2% SDS (GE Healthcare)</li><li>• 50 mM Tris pH 8 (Astral Scientific)</li><li>• Protease inhibitor cocktail 1/100 (Sigma Aldrich)</li><li>• 20 mM dithiothreitol (Roche)</li></ul> <p>Combine all above ingredients (except for protease inhibitor) and mix well. Store at -20°C. Just before using the buffer, add the protease inhibitor to the solution.</p>                            |
